# Supplementary material for: Acrolein-integrated ESIPT probe for NIR fluorescence detection of cysteine with ultrafast response and sub-nanomolar sensitivity
Source: Royal Society of Chemistry journal article supplement (doi:10.1039/d5ay01661d), 2026-01-01
Supplement: d5ay01661d1.pdf [file d5ay01661d1.pdf]

# Acrolein-Integrated ESIPT Probe for NIR Fluorescence Detection of Cysteine with Ultrafast Response and Sub-nanomolar Sensitivity

Shuangying Su<sup>a</sup>, Binjie Zhang<sup>a</sup>, Shijun Chen<sup>a\*</sup>, Cailing Fan, Xianzhe Yu<sup>a</sup>, Wei Shu<sup>b</sup>, Weijie Chi<sup>a\*</sup>, Chaoyuan Zeng<sup>a\*</sup>

<sup>a</sup> School of Chemistry and Chemical Engineering, Key Laboratory of Ministry of Education for Advanced Materials in Tropical Island Resources, Collaborative Innovation

Center of Ecological Civilization, Hainan University, Haikou 570228, P. R. China.

<sup>b</sup> School of Life Sciences and Medicine, Shandong University of Technology, Zibo 255000, P. R. China.

\*Corresponding author: shijunchen@hainanu.edu.cn (S.J.Chen)

weijie\_chi@hainanu.edu.cn (W.J.Chi), zengchaoyuan@hainanu.edu.cn (C.Y. Zeng).

## Content

|                                                                         |    |
|-------------------------------------------------------------------------|----|
| 1 Synthesis .....                                                       | 1  |
| 1.1 Synthesis of M1: .....                                              | 1  |
| 1.2 Synthesis of M2: .....                                              | 2  |
| 1.3 Synthesis of M3: .....                                              | 2  |
| 1.4 Synthesis of probe 1 : .....                                        | 3  |
| 1.5 Synthesis of probe 2 : .....                                        | 3  |
| 1.6 Synthesis of probe 3 : .....                                        | 4  |
| 1.7 Synthesis of probe 4 : .....                                        | 4  |
| 2 Schematic illustration of the ESIPT mechanism.....                    | 5  |
| 3 optical physical properties.....                                      | 6  |
| 3 Images of interference testing of different ions under sunlight ..... | 12 |
| 4 Characterization .....                                                | 14 |

## 1 Synthesis

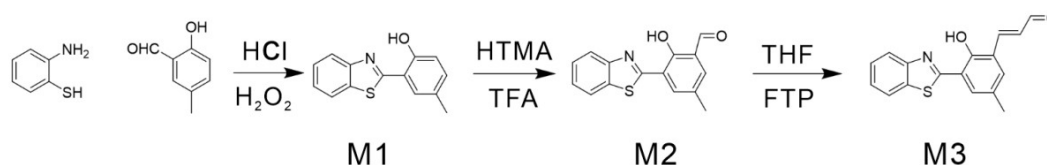

Scheme.S1 Synthesis of M1, M2 and M3

### 1.1 Synthesis of M1:

5-Methylsalicylaldehyde (5-MSA) and 2-aminobenzenethiol (2-ABT) were subjected to three cycles of vacuum evacuation and nitrogen purging to ensure an inert atmosphere. Subsequently, the mixture was dissolved in 60 mL of anhydrous ethanol. Under the condition of an ice-salt bath, 4.84 mL of concentrated hydrochloric acid was slowly added dropwise. The reaction mixture was stirred for 10 min, after which 10 mL of 30% hydrogen peroxide was slowly introduced. The reaction was allowed to proceed at room temperature for 2 h. Upon completion of the reaction, the product was isolated by ethanol washing, yielding a white solid, designated as M 1, with a yield of 54%.

### 1.2 Synthesis of M2:

M1 and hexamethylenetetramine were dissolved in 80 mL (25 eq.) of trifluoroacetic acid. The mixture was heated to 70°C and refluxed for 12 h. After the reaction was complete, the mixture was cooled to room temperature and neutralized with a saturated aqueous solution of KOH until the reaction mixture reached neutrality. The product was then extracted with dichloromethane, dried over anhydrous sodium sulfate, and the solvent was removed under reduced pressure to obtain the crude product. The crude product was purified by column chromatography using a petroleum ether (PE) to ethyl acetate (EA) ratio of 20:1 to yield the pure product M2 with a yield of 64%.

### 1.3 Synthesis of M3:

M2 and (formylmethylene)triphenylphosphorane were subjected to three cycles of vacuum evacuation and nitrogen purging to ensure an inert atmosphere. The mixture was then dissolved in 50 mL of anhydrous tetrahydrofuran (THF). Upon complete dissolution, the reaction mixture was heated to 66°C and refluxed for 24 h. After the reaction was complete, the solvent was removed under reduced pressure to obtain the crude product. The crude product was purified by column chromatography using a petroleum ether (PE) to ethyl acetate (EA) ratio of 20:1, yielding a pale yellow solid, designated as M3, with a yield of 68%.

### 1.4 Synthesis of probe 1 :

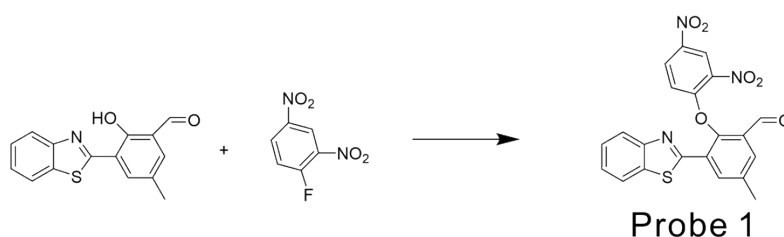

Scheme.S2 Synthesis of Probe 1

M2, 2,4-dinitrofluorobenzene, and potassium carbonate were combined in 8 mL of dimethylformamide (DMF) and stirred at room temperature for 1 h. The reaction mixture was then poured into ice water, and the crude product was isolated by centrifugation. The crude product was purified by flash column chromatography using a petroleum ether (PE) to ethyl acetate (EA) ratio of 10:1, yielding the product Probe 1 with a yield of 54%. <sup>1</sup>H NMR (400 MHz, DMSO) δ 8.962 (d, *J* = 2.8 Hz, 1H), 8.398 (dd, *J* = 9.3, 2.9 Hz, 1H), 8.305 (d, *J* = 3.1 Hz, 1H), 8.092 (d, *J* = 8.1 Hz, 1H), 8.026 (d, *J* = 7.9 Hz, 1H), 7.561 (d, *J* = 5.9 Hz, 1H), 7.533 (s, 1H), 7.476 – 7.428 (m, 1H), 7.383 (d, *J* = 8.3 Hz, 1H), 7.184 (d, *J* = 9.3 Hz, 1H), 2.490 (s, 3H).

### 1.5 Synthesis of probe 2 :

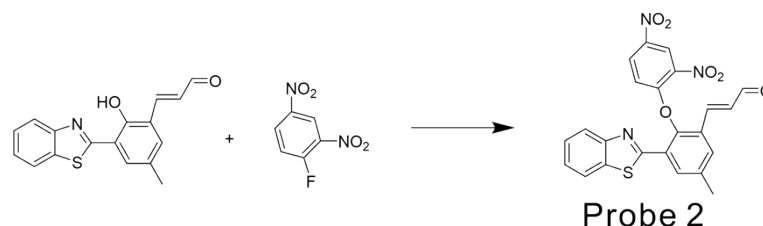

Scheme.S3 Synthesis of Probe 2

M3, 2,4-dinitrofluorobenzene, and potassium carbonate were added to 8 mL of dimethylformamide (DMF). The mixture was stirred at room temperature for 1 h. The reaction mixture was subsequently poured into ice water, and the crude product was isolated by centrifugation. The crude product was purified by flash column chromatography using a petroleum ether (PE) to ethyl acetate (EA) ratio of 10:1, yielding the product probe 2 with a yield of 39%.  $^1\text{H}$  NMR (400 MHz, DMSO)  $\delta$  9.610 (d,  $J$  = 7.5 Hz, 1H), 8.976 (d,  $J$  = 2.8 Hz, 1H), 8.316 (d,  $J$  = 1.3 Hz, 1H), 8.284 (dd,  $J$  = 9.3, 2.8 Hz, 1H), 8.175 (d,  $J$  = 2.2 Hz, 1H), 8.092 (d,  $J$  = 7.4 Hz, 1H), 7.947 (d,  $J$  = 7.8 Hz, 1H), 7.728 (d,  $J$  = 16.0 Hz, 1H), 7.541 (t,  $J$  = 7.0 Hz, 1H), 7.479 – 7.428 (m, 1H), 7.029 (dd,  $J$  = 15.9, 7.6 Hz, 1H), 6.930 (d,  $J$  = 9.3 Hz, 1H), 2.550 (s, 3H).

### 1.6 Synthesis of probe 3 :

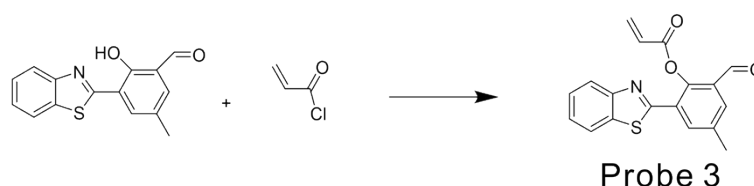

Scheme.S4 Synthesis of Probe 3

M2 and acryloyl chloride were dissolved in 20 mL of anhydrous dichloromethane. Under an ice-water bath condition, triethylamine was added dropwise while maintaining the temperature at 0°C for 12 h. After the reaction was complete, water was added to wash the product, yielding a white solid, designated as Probe 3,

with a yield of 65%. <sup>1</sup>H NMR (400 MHz, DMSO) δ 8.563 (s, 1H), 8.448 (s, 1H), 8.276 (d, *J* = 7.3 Hz, 1H), 8.148 (d, *J* = 8.1 Hz, 1H), 7.857 (s, 1H), 7.659 – 7.575 (m, 1H), 7.531 (t, *J* = 7.6 Hz, 1H), 4.436 (s, 2H), 2.525 (s, 3H).

### 1.7 Synthesis of probe 4 :

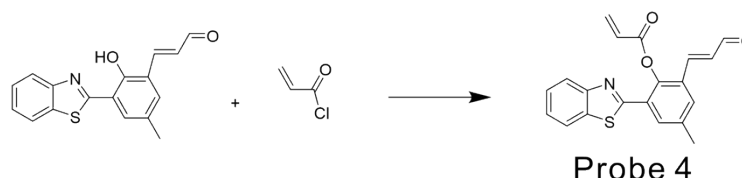

Scheme.S5 Synthesis of Probe 4

M3 and acryloyl chloride were dissolved in 20 mL of anhydrous dichloromethane. Under an ice-water bath condition, triethylamine was added dropwise while maintaining the temperature at 0°C for 12 h. After the reaction was complete, water was added to quench the excess acryloyl chloride. The product was extracted with dichloromethane, dried over anhydrous sodium sulfate, and the solvent was removed under reduced pressure. The crude product was purified by flash column chromatography using a petroleum ether (PE) to ethyl acetate (EA) ratio of 5:1, yielding a product designated as Probe 4 with a yield of 70%. <sup>1</sup>H NMR (600 MHz, CDCl<sub>3</sub>) δ 9.608 (d, *J* = 7.6 Hz, 1H), 8.083 (s, 1H), 7.971 (d, *J* = 8.2 Hz, 1H), 7.833 (d, *J* = 8.0 Hz, 1H), 7.524 (s, 1H), 7.456 – 7.399 (m, 2H), 7.335 (t, *J* = 7.6 Hz, 1H), 6.717 – 6.670 (m, 1H), 6.653 (d, *J* = 12.1 Hz, 1H), 6.455 (dd, *J* = 17.3, 10.5 Hz, 1H), 6.113 (d, *J* = 10.5 Hz, 1H), 2.417 (s, 3H). HRMS calculated the molar weight as [C<sub>20</sub>H<sub>15</sub>NO<sub>3</sub>S+H]<sup>+</sup> = 350.0845, found = 350.0884.ppm = 11.14ppm.

## 2 Schematic illustration of the ESIPT mechanism

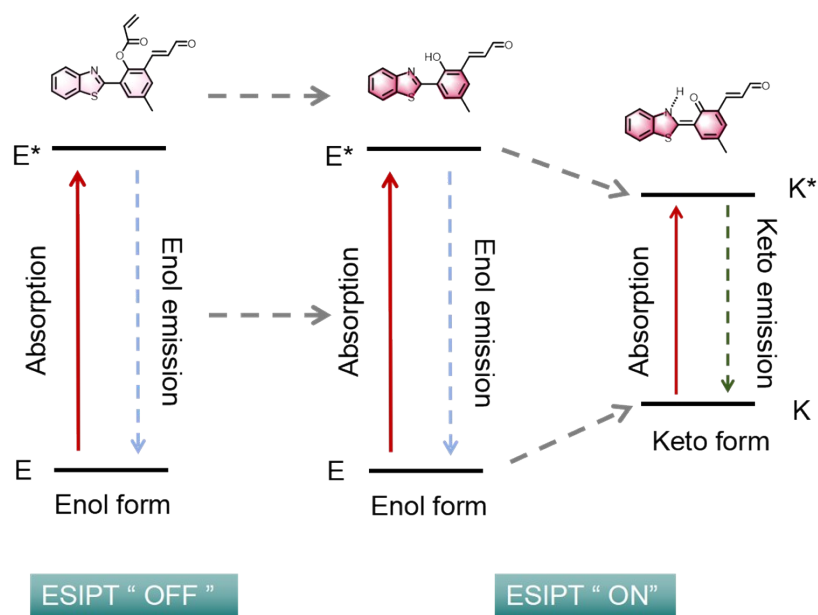

Scheme.S6 ESIPT mechanism of Probe 4

## 3 optical physical properties

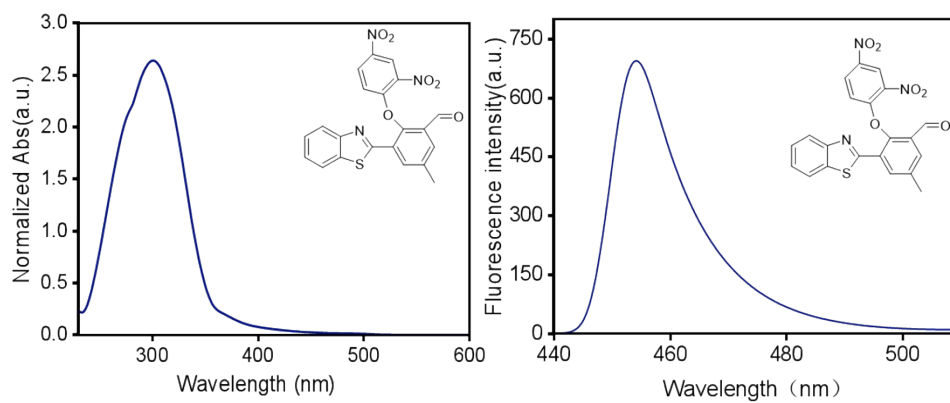

Fig.S1 UV absorption and fluorescence emission of Probe 1

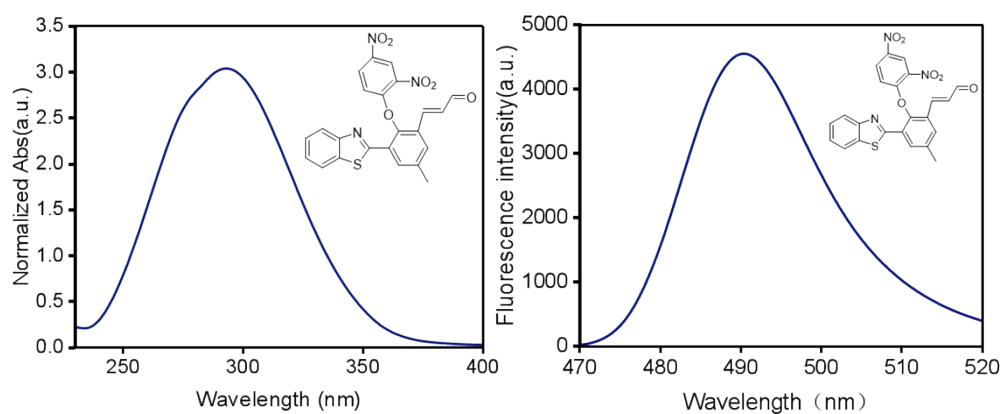

Fig.S2 UV absorption and fluorescence emission of Probe 2

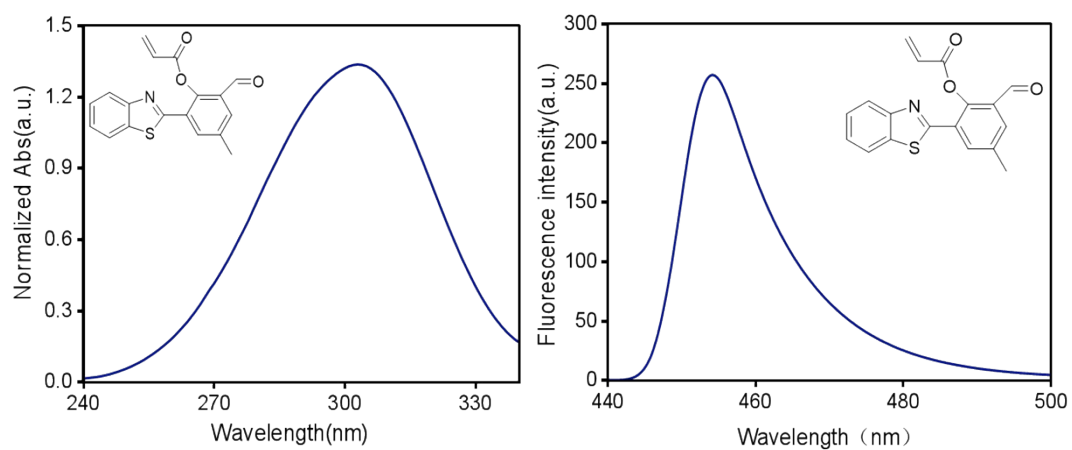

Figure.S3 UV absorption and fluorescence emission of Probe 3

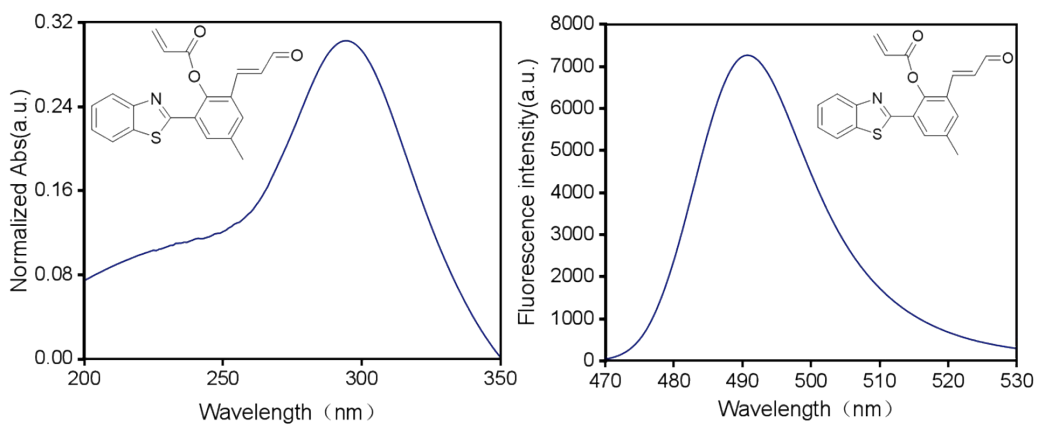

Fig.S4 UV absorption and fluorescence emission of Probe 4

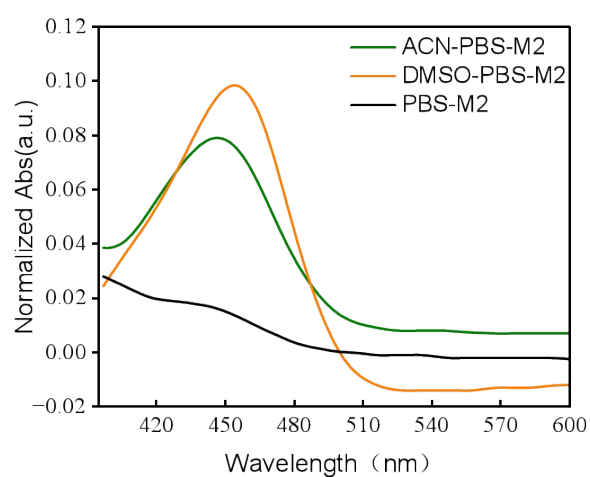

Fig.S5 M2 UV absorption

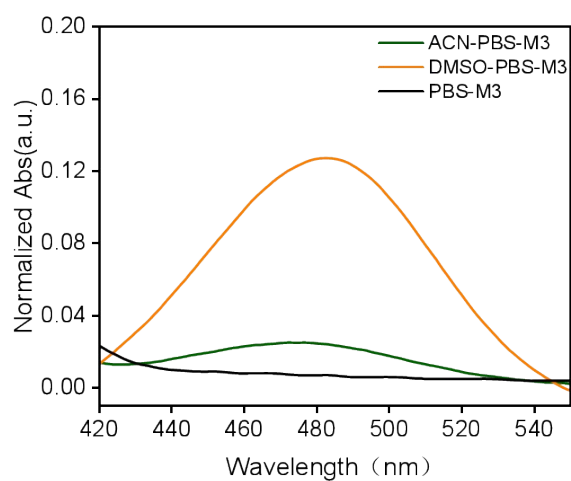

Fig.S6 M3 UV absorption

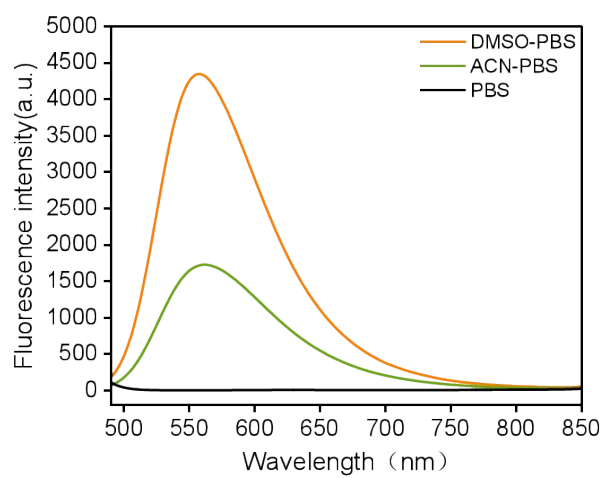

Fig.S7 M2 Fluorescence Emission



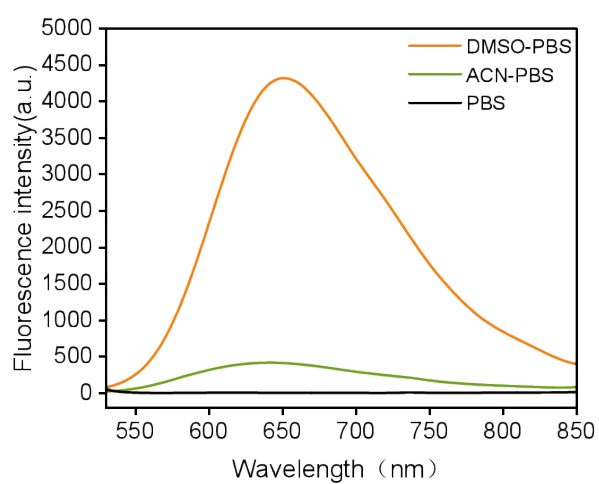

Fig.S8 M3 Fluorescence Emission

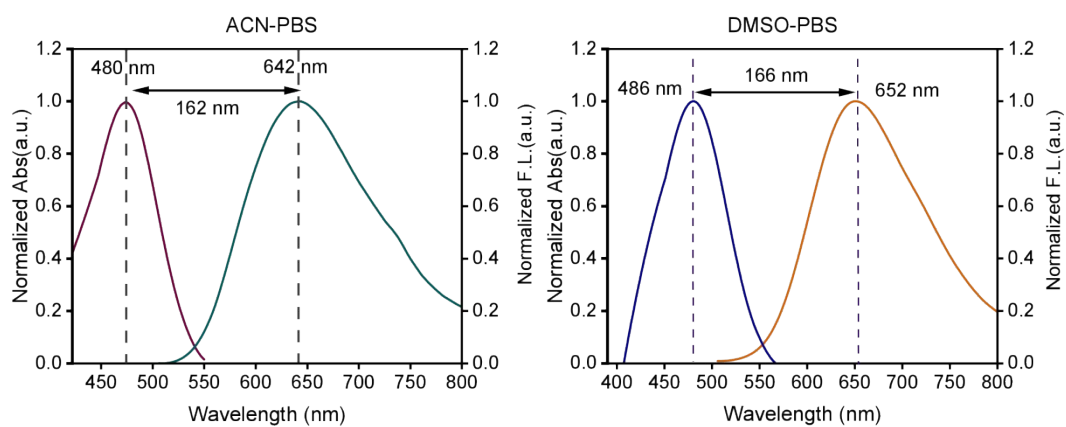

Fig.S9 The Stokes shift of Probe 4 in ACN-PBS and DMSO-PBS

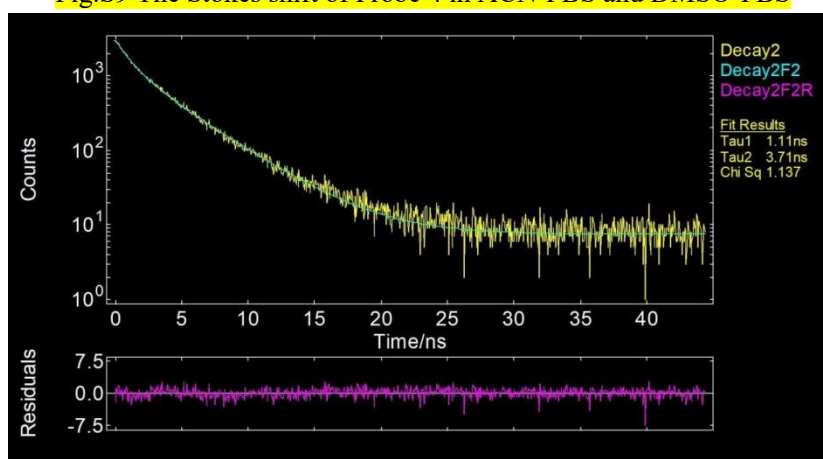

Fig.S10 Quantum yield of the probe 4

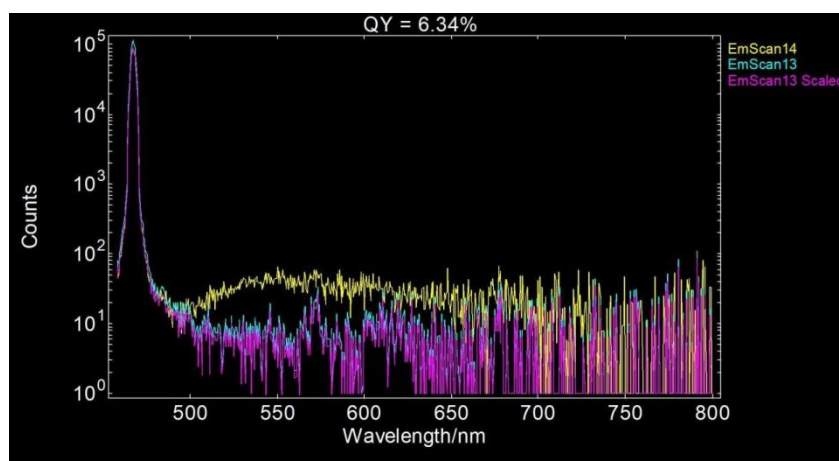

Fig.S11 fluorescence lifetime of the probe 4

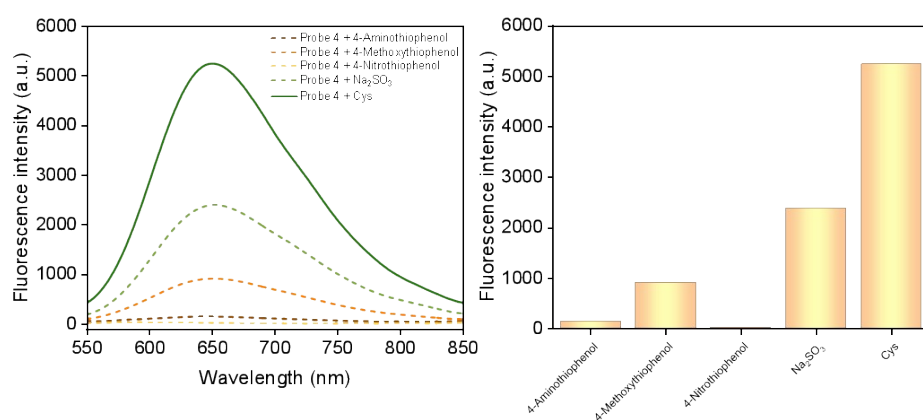

Fig.S12 Selective detection for aromatic thiols and  $\text{HSO}_3^-$

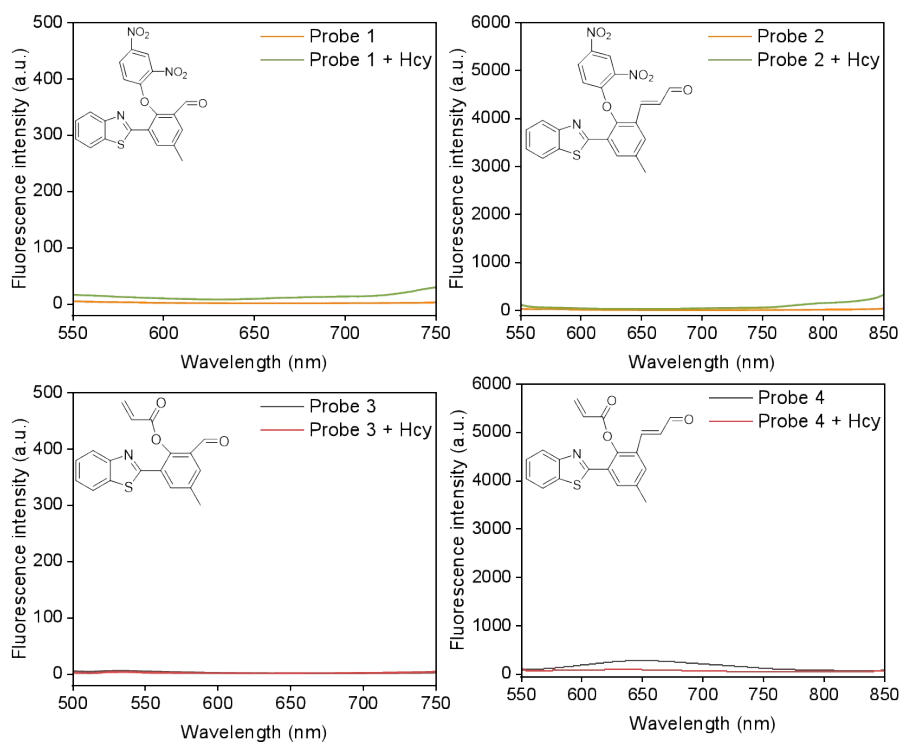

Fig.S13 Probes for the detection of Hcy

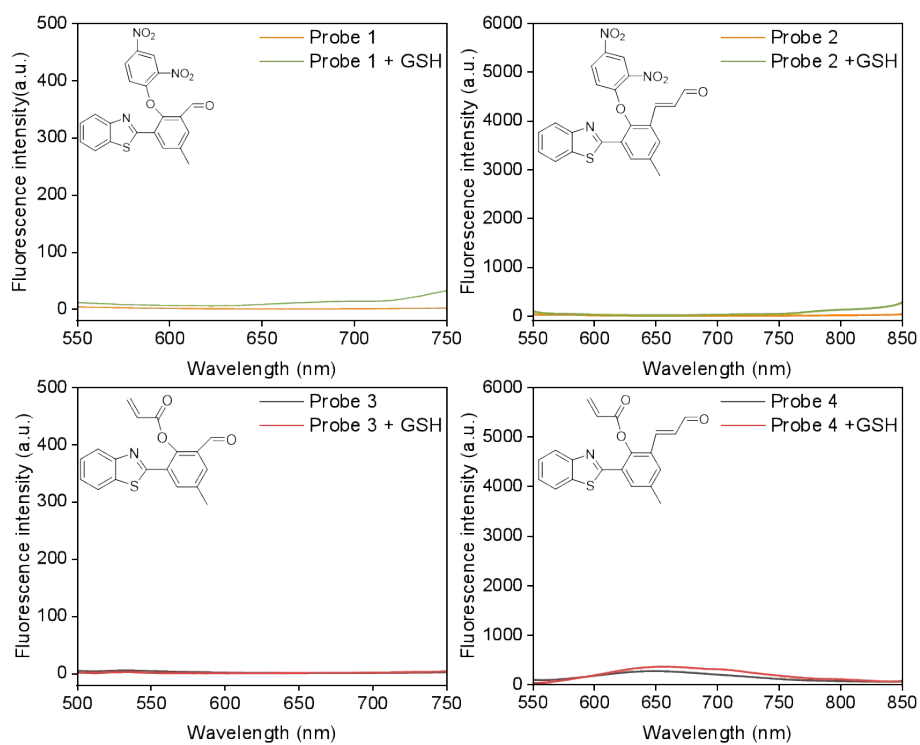

**Fig.S14 Probes for the detection of GSH**

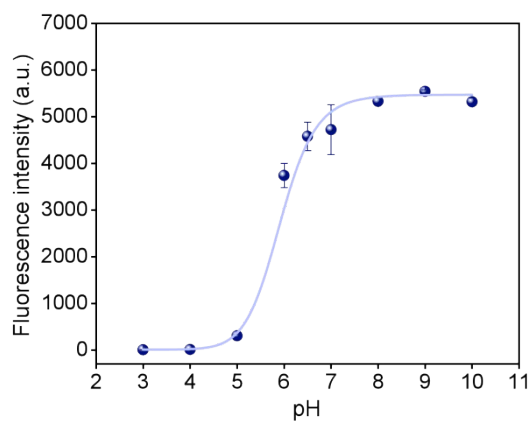

**Fig.S15 The pKa of Probe 4**

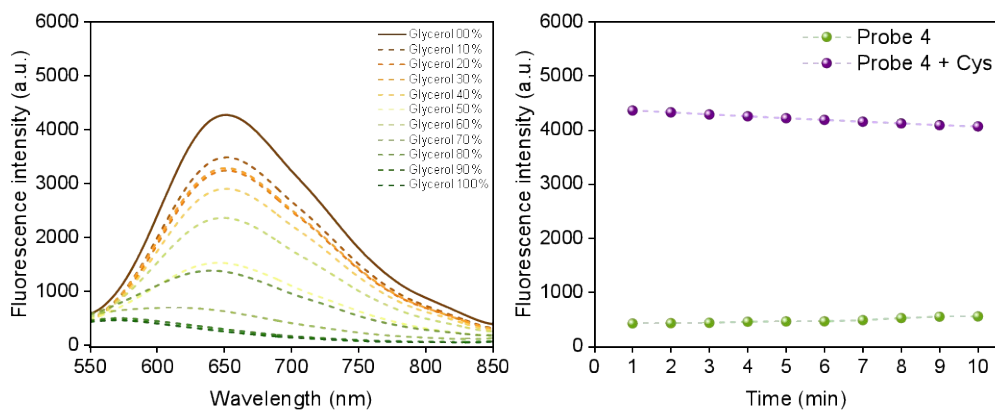

Fig.S16 Viscosity response, long-term stability, and photobleaching resistance of the probe 4

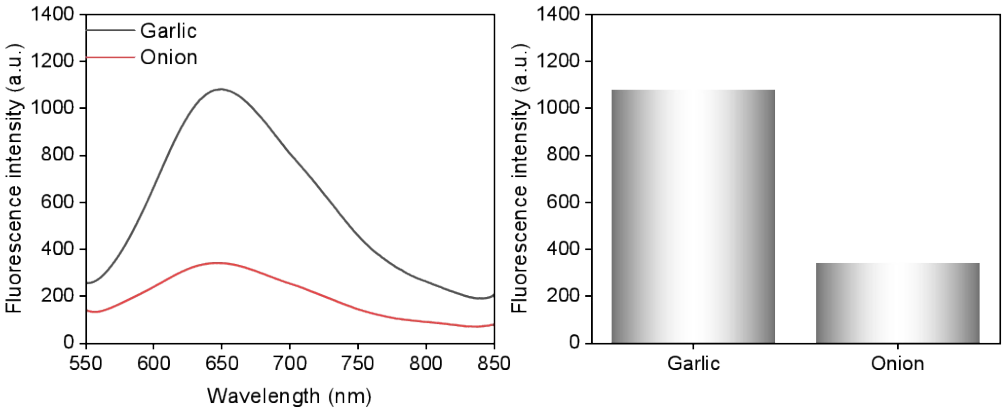

Fig.S17 Detection of Cys in garlic and onion samples using a probe

|     | S    | K      | Formula         | Value                             |
|-----|------|--------|-----------------|-----------------------------------|
| LOD | 0.05 | 437.51 | $\frac{3S}{K}$  | $3.42 \times 10^{-4} \mu\text{M}$ |
| LOQ | 0.05 | 437.51 | $\frac{10S}{K}$ | $1.14 \times 10^{-3} \mu\text{M}$ |

Table.S1 LOD and LOQ

3 Images of interference testing of different ions under sunlight

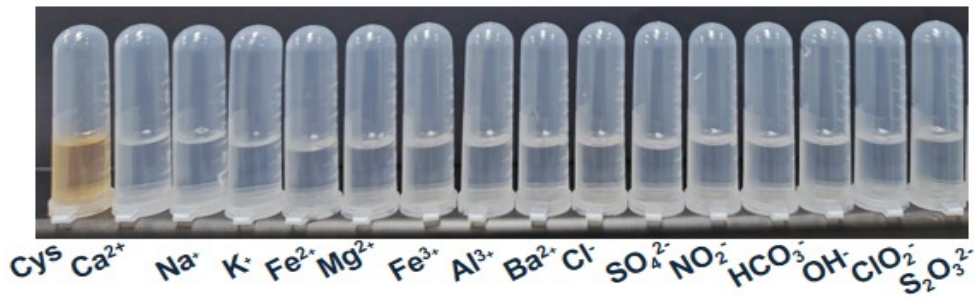

Fig.S18 Images of interference testing of different ions under sunlight

| Probe                                                                               | Solvent system                                                 | Mechanism | Time (min) | Limit of detection                | Reaction sites | Ref.                                                                                          |
|-------------------------------------------------------------------------------------|----------------------------------------------------------------|-----------|------------|-----------------------------------|----------------|-----------------------------------------------------------------------------------------------|
| 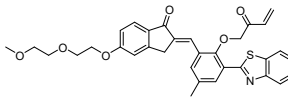   | PBS                                                            | ESIPT     | 90         | 0.89 $\mu\text{M}$                | acrylate       | Dyes and Pigments<br>Volume 219, November 2023, 111649                                        |
|    | PBS / DMSO (1:1, v/v)                                          | ESIPT     | 7.5        | $6.4 \times 10^{-2} \mu\text{M}$  | acrylate       | Analytica Chimica Acta<br>Volume 1279, 23 October 2023, 341819                                |
|    | H <sub>2</sub> O / DMSO (99:1, v/v)                            | ESIPT     | 60         | -                                 | acrylate       | Dyes and Pigments<br>Volume 212, April 2023, 111088                                           |
|    | PBS                                                            | ICT       | 30         | $3.98 \times 10^{-2} \mu\text{M}$ | acrylate       | Journal of Photochemistry and Photobiology A: Chemistry<br>Volume 431, 1 October 2022, 114074 |
|    | MeCN / H <sub>2</sub> O (1:1, v/v)                             | ESIPT     | 30         | 6.51 $\mu\text{M}$                | acrylate       | Dyes and Pigments<br>Volume 203, July 2022, 110305                                            |
|   | CH <sub>3</sub> CN / CH <sub>3</sub> OH / Hepes (1:1:1, v/v/v) | ESIPT     | 14         | 0.20 $\mu\text{M}$                | acrylate       | Sensors and Actuators B: Chemical<br>Volume 319, 15 September 2020, 128248                    |
|  | PBS / DMSO (1:4, v/v)                                          | ESIPT     | 15         | $4.23 \times 10^{-2} \mu\text{M}$ | acrylate       | Talanta<br>Volume 194, 1 March 2019, Pages 717-722                                            |
|  | PBS / DMSO (7:3, v/v)                                          | ESIPT     | 10         | 0.64 $\mu\text{M}$                | acrylate       | Sensors and Actuators B: Chemical<br>Volume 233, 5 October 2016, Pages 173-179                |
|  | PBS / DMSO (1:1, v/v)                                          | ESIPT     | 10         | $3.42 \times 10^{-4} \mu\text{M}$ | acrylate       | <b>This work</b>                                                                              |

**Table S2 Comparison of Key Parameters with Related Probes**

## 4 Characterization

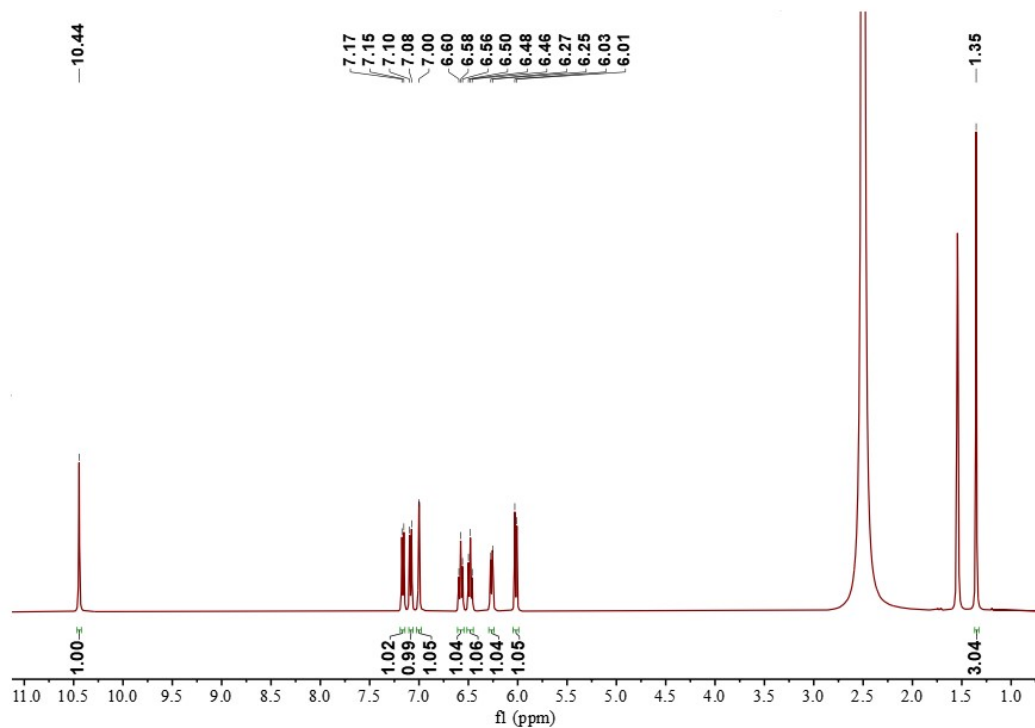

Fig.S19 <sup>1</sup>H NMR of M1

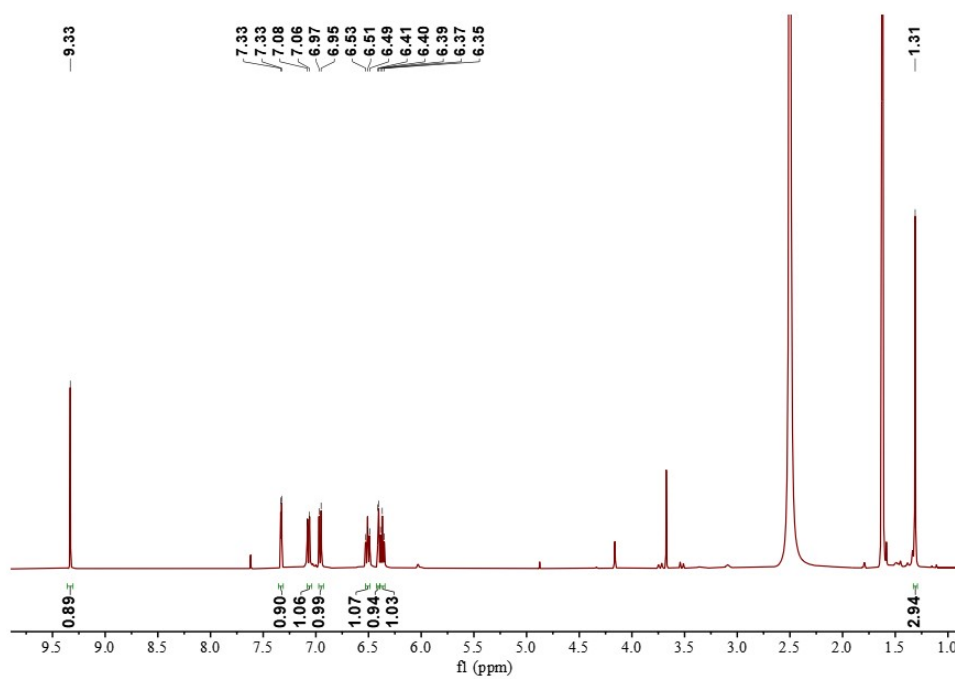

Fig.S20 <sup>1</sup>H NMR of M2

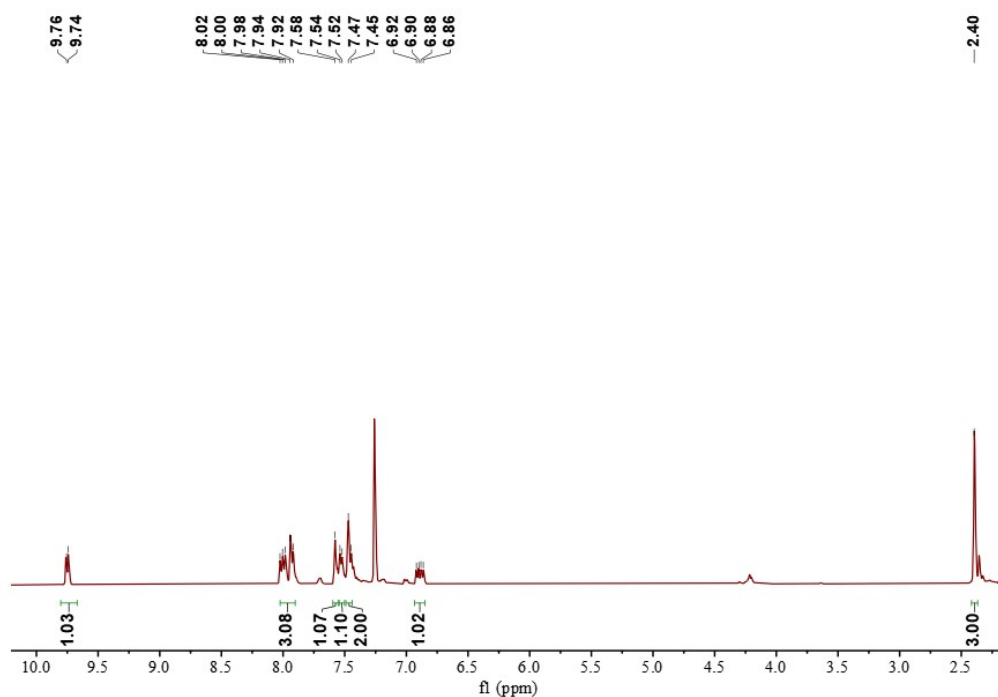

Fig.S21 <sup>1</sup>H NMR of M3

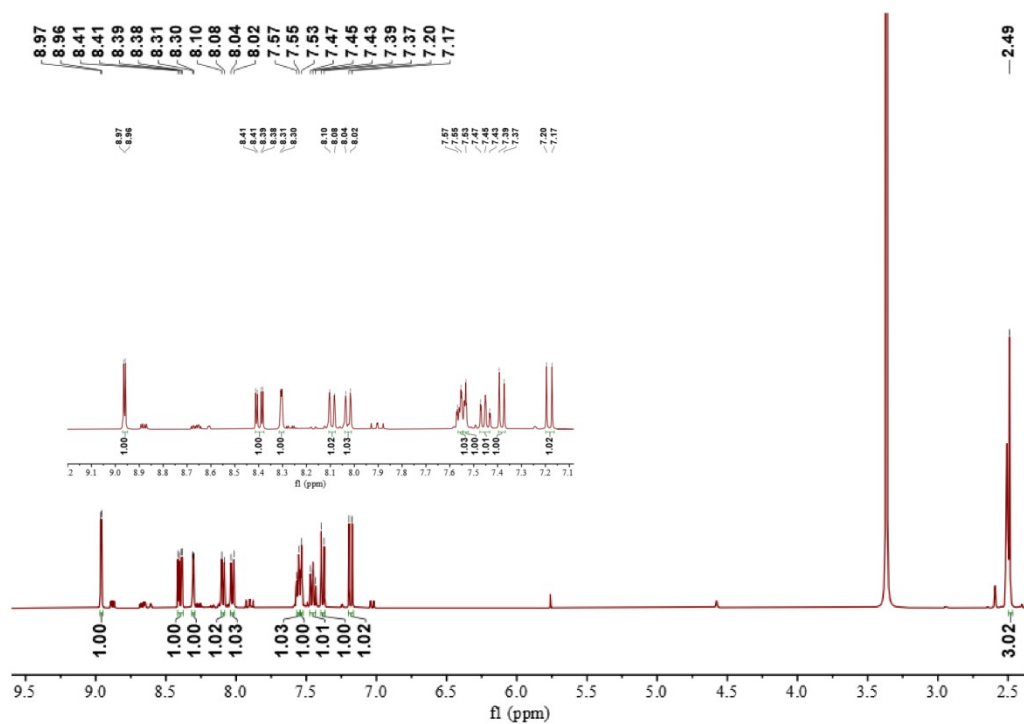

Fig.S22 <sup>1</sup>H NMR of Probe 1

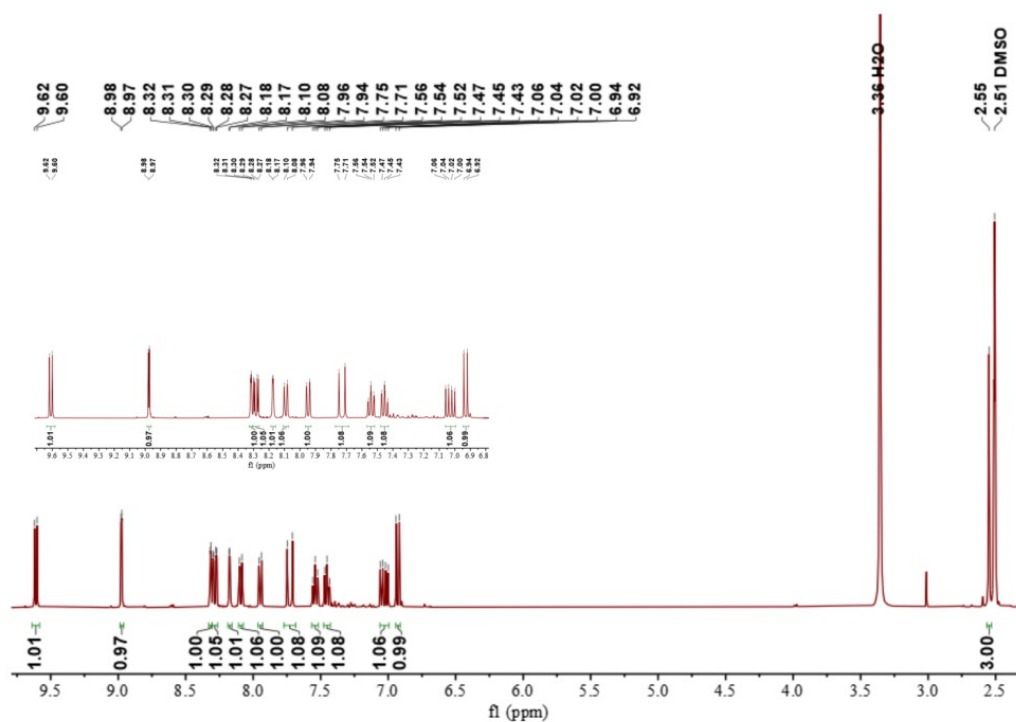

Fig.S23 <sup>1</sup>H NMR of Probe 2

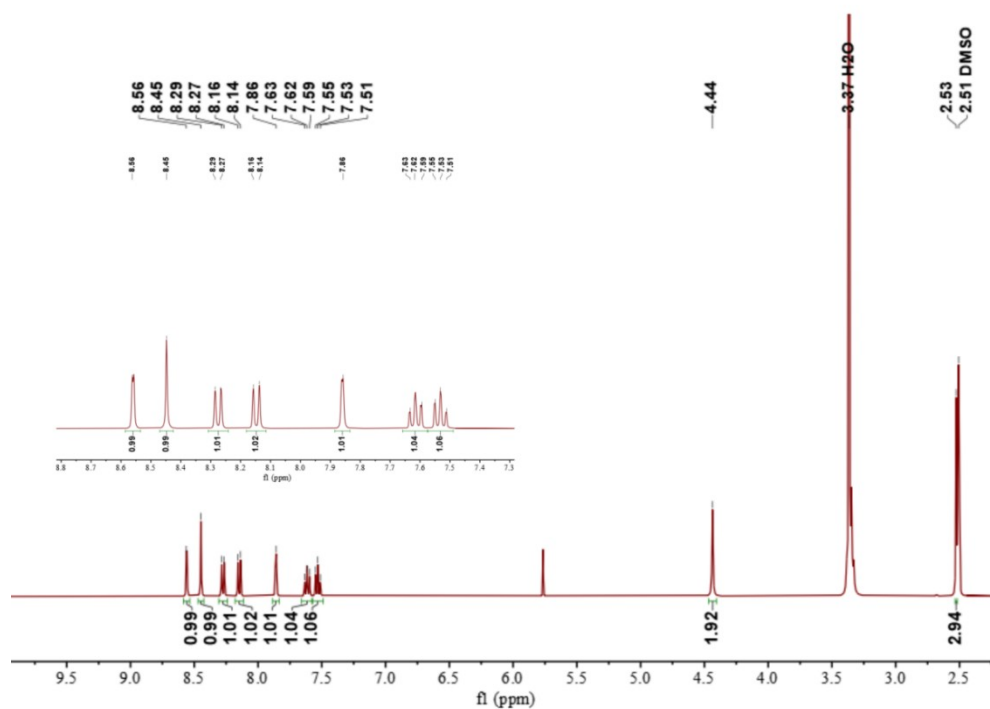

Fig.S24 <sup>1</sup>H NMR of Probe 3



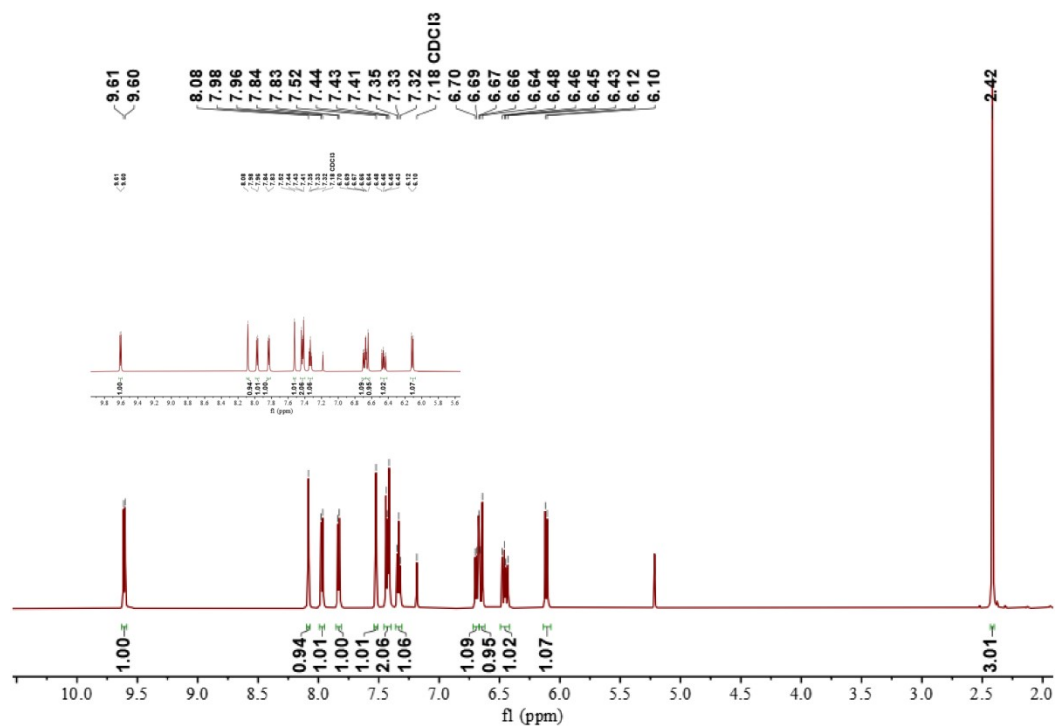

Fig.S25 <sup>1</sup>H NMR of Probe 4

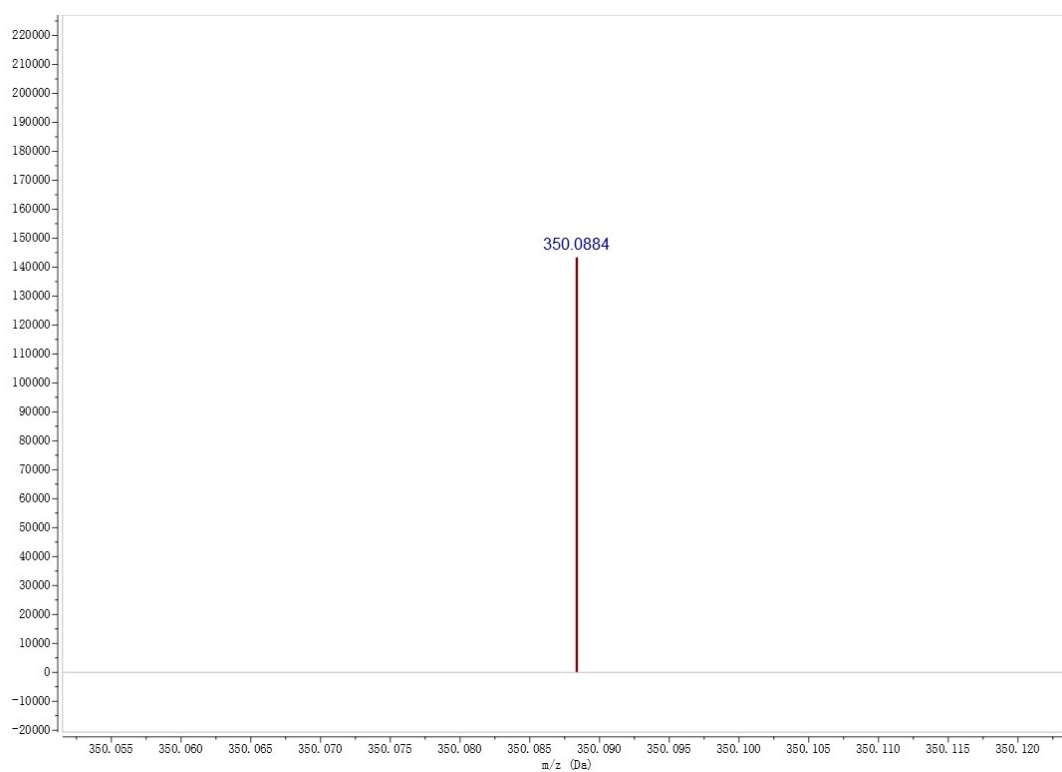

Fig.S26 HRMS of Probe 4
